# Supplementary material for: Adaptive Routing and Recharging Policies for Electric Vehicles
Source: Atypon-hosted journal article supplement (doi:10.1287/trsc.2016.0724), 2017-03-20
Supplement: trsc.2016.0724-sm.pdf [file trsc.2016.0724-sm.pdf]

# Adaptive Routing and Recharging Policies for Electric Vehicles

Timothy M. Sweda, Irina S. Dolinskaya, Diego Klabjan

Department of Industrial Engineering and Management Sciences

Northwestern University

2145 Sheridan Rd.

Evanston, Illinois 60208, USA

E-mail: swedat@schneider.com, dolira@northwestern.edu, d-klabjan@northwestern.edu

## A Appendix

### A.1 Code for procedures used in Algorithm 1

---

```
1: procedure FindOptDirectPath( $\mathcal{G}, x, y, k$ )
2: {
3:  $G = \{(i, j) \in \mathcal{N} : 0 \leq i \leq x, 0 \leq j \leq y\}$ 
4:  $check(0, 0) = 1$ 
5: for  $diag = 0, \dots, x + y - 1$  do
6:   for  $(i, j) \in G : i + j = diag$  do
7:     if  $V(i, j) + LB(|x - i| + |y - j|) < V(x, y)$  then
8:       for all  $(\Delta i, \Delta j) : \Delta i \geq 0, \Delta j \geq 0, 0 < \Delta i + \Delta j < k, (i + \Delta i, j + \Delta j) \in G$  do
9:          $v = V(i, j) + (1 - E[A_i])\mathcal{W}_i + s + c((\Delta i + \Delta j) \cdot h, 0) + (\Delta i + \Delta j) \cdot t$ 
10:        if  $v < V(i + \Delta i, j + \Delta j)$  then
11:           $V(i + \Delta i, j + \Delta j) = v$ 
12:           $pred(i + \Delta i, j + \Delta j) = (i, j)$ 
13:           $check(i + \Delta i, j + \Delta j) = 2$ 
14:        end if
15:      end for
16:    end if
17:  end for
18: end for
19: }
```

---

---

```

20: procedure ScanReverse( $\mathcal{G}, x, y, k, V, check, pred$ )
21: {
22:    $ScanType = null$ 
23:    $diag = MaxDiag$ 
24:   while  $diag \geq MinDiag$  do
25:      $lo = \min\{i : check(i, diag - i) > 0\}$ 
26:      $hi = \max\{i : check(i, diag - i) > 0\}$ 
27:      $i = lo$ 
28:      $j = diag - i$ 
29:     while ( $i \leq hi$  or  $check(i, j) > 0$ ) do
30:       if ( $check(i, j) > 0$  and  $V(i, j) + LB(|x - i| + |y - j|) < V(x, y)$ ) then
31:         for  $\Delta i = 1, \dots, \lfloor k/2 \rfloor$  do
32:            $v = V(i, j) + \frac{\lambda_{ij}/\mu_{ij}}{\lambda_{ij} + \mu_{ij}} + s + c(2\Delta i \cdot h, 0) + 2\Delta i \cdot t$ 
33:           if  $v < V(i + \Delta i, j - \Delta i)$  then
34:              $V(i + \Delta i, j - \Delta i) = v$ 
35:              $pred(i + \Delta i, j - \Delta i) = (i, j)$ 
36:              $check(i + \Delta i, j - \Delta i) = 2$ 
37:              $ScanType = forward$ 
38:           end if
39:         end for
40:       end if
41:        $i = i + 1$ 
42:        $j = j - 1$ 
43:     end while
44:      $i = hi$ 
45:      $j = diag - i$ 
46:     while ( $i \geq lo$  or  $check(i, j) > 0$ ) do
47:       if ( $check(i, j) > 0$  and  $V(i, j) + LB(|x - i| + |y - j|) < V(x, y)$ ) then
48:          $check(i, j) = check(i, j) - 1$ 
49:         for  $\Delta i = 1, \dots, \lfloor k/2 \rfloor$  do
50:            $v = V(i, j) + \frac{\lambda_{ij}/\mu_{ij}}{\lambda_{ij} + \mu_{ij}} + s + c(2\Delta i \cdot h, 0) + 2\Delta i \cdot t$ 
51:           if  $v < V(i - \Delta i, j + \Delta i)$  then
52:              $V(i - \Delta i, j + \Delta i) = v$ 
53:              $pred(i - \Delta i, j + \Delta i) = (i, j)$ 
54:              $check(i - \Delta i, j + \Delta i) = 2$ 
55:              $ScanType = forward$ 
56:           end if
57:         end for
58:       for all  $(\Delta i, \Delta j) : \Delta i + \Delta j < 0, |\Delta i| + |\Delta j| \leq k$  do
59:          $v = V(i, j) + \frac{\lambda_{ij}/\mu_{ij}}{\lambda_{ij} + \mu_{ij}} + s + c((|\Delta i| + |\Delta j|) \cdot h, 0) + (|\Delta i| + |\Delta j|) \cdot t$ 
60:         if  $v < V(i + \Delta i, j + \Delta j)$  then
61:            $V(i + \Delta i, j + \Delta j) = v$ 
62:            $pred(i + \Delta i, j + \Delta j) = (i, j)$ 
63:            $check(i + \Delta i, j + \Delta j) = 2$ 
64:            $ScanType = forward$ 
65:            $MinDiag = \min\{MinDiag, diag + \Delta i + \Delta j\}$ 
66:         end if
67:       end for
68:     end if
69:   end while
70:    $diag = diag - 1$ 
71: end while
72: }

```

---

```

73: procedure ScanForward( $\mathcal{G}, x, y, k, V, check, pred$ )
74: {
75:    $ScanType = null$ 
76:    $diag = MinDiag$ 
77:   while  $diag \leq MaxDiag$  do
78:      $lo = \min\{i : check(i, diag - i) > 0\}$ 
79:      $hi = \max\{i : check(i, diag - i) > 0\}$ 
80:      $i = lo$ 
81:      $j = diag - i$ 
82:     while ( $i \leq hi$  or  $check(i, j) > 0$ ) do
83:       if ( $check(i, j) > 0$  and  $V(i, j) + LB(|x - i| + |y - j|) < V(x, y)$ ) then
84:         for  $\Delta i = 1, \dots, \lfloor k/2 \rfloor$  do
85:            $v = V(i, j) + \frac{\lambda_{ij}/\mu_{ij}}{\lambda_{ij} + \mu_{ij}} + s + c(2\Delta i \cdot h, 0) + 2\Delta i \cdot t$ 
86:           if  $v < V(i + \Delta i, j - \Delta i)$  then
87:              $V(i + \Delta i, j - \Delta i) = v$ 
88:              $pred(i + \Delta i, j - \Delta i) = (i, j)$ 
89:              $check(i + \Delta i, j - \Delta i) = 2$ 
90:              $ScanType = reverse$ 
91:           end if
92:         end for
93:       end if
94:        $i = i + 1$ 
95:        $j = j - 1$ 
96:     end while
97:      $i = hi$ 
98:      $j = diag - i$ 
99:     while ( $i \geq lo$  or  $check(i, j) > 0$ ) do
100:      if ( $check(i, j) > 0$  and  $V(i, j) + LB(|x - i| + |y - j|) < V(x, y)$ ) then
101:         $check(i, j) = check(i, j) - 1$ 
102:        for  $\Delta i = 1, \dots, \lfloor k/2 \rfloor$  do
103:           $v = V(i, j) + \frac{\lambda_{ij}/\mu_{ij}}{\lambda_{ij} + \mu_{ij}} + s + c(2\Delta i \cdot h, 0) + 2\Delta i \cdot t$ 
104:          if  $v < V(i - \Delta i, j + \Delta i)$  then
105:             $V(i - \Delta i, j + \Delta i) = v$ 
106:             $pred(i - \Delta i, j + \Delta i) = (i, j)$ 
107:             $check(i - \Delta i, j + \Delta i) = 2$ 
108:             $ScanType = reverse$ 
109:          end if
110:        end for
111:        for all ( $\Delta i, \Delta j$ ) :  $\Delta i + \Delta j > 0, |\Delta i| + |\Delta j| \leq k$  do
112:           $v = V(i, j) + \frac{\lambda_{ij}/\mu_{ij}}{\lambda_{ij} + \mu_{ij}} + s + c((|\Delta i| + |\Delta j|) \cdot h, 0) + (|\Delta i| + |\Delta j|) \cdot t$ 
113:          if  $v < V(i + \Delta i, j + \Delta j)$  then
114:             $V(i + \Delta i, j + \Delta j) = v$ 
115:             $pred(i + \Delta i, j + \Delta j) = (i, j)$ 
116:             $check(i + \Delta i, j + \Delta j) = 2$ 
117:             $ScanType = reverse$ 
118:             $MaxDiag = \max\{MaxDiag, diag + \Delta i + \Delta j\}$ 
119:          end if
120:        end for
121:      end if
122:    end while
123:     $diag = diag + 1$ 
124:  end while
125: }

```

## A.2 Omitted Proofs

### A.2.1 Proof of Lemma 1

**Proof.** Suppose  $\pi_{\mathcal{N}}^R : \mathcal{S} \rightarrow \mathcal{A}^R$  is a feasible recharging policy, and there exists a state  $(i, q_i, a_i) \in \mathcal{S}$  such that  $\pi_{\mathcal{N}}^R(i, q_i, a_i) = \sum_{\ell=i}^{k-1} h_\ell - q_i + \Delta > 0$  for some  $k \in (i+1, \dots, n-1)$  and  $0 \leq \Delta < h_k$ . Then consider an alternate policy  $\pi_{\mathcal{N}}^{R'} : \mathcal{S} \rightarrow \mathcal{A}^R$  where

$$\pi_{\mathcal{N}}^{R'}(j, q_j, a_j) = \begin{cases} \pi_{\mathcal{N}}^R(j, q_j, a_j) - \Delta, & (j, q_j, a_j) = (i, q_i, a_i) \\ \pi_{\mathcal{N}}^R(j, q_j + \Delta, a_j) + \Delta I_{\pi_{\mathcal{N}}^R(j, q_j + \Delta, a_j) > 0}, & j \in (i+1, \dots, k) \text{ and } q_j = \sum_{\ell=j}^{k-1} h_\ell \\ \pi_{\mathcal{N}}^R(j, q_j, a_j), & \text{otherwise} \end{cases}$$

for any  $(j, q_j, a_j) \in \mathcal{S}$ , where  $I_{\pi_{\mathcal{N}}^R(j, q_j + \Delta, a_j) > 0}$  equals 1 if  $\pi_{\mathcal{N}}^R(j, q_j + \Delta, a_j) > 0$  and 0 otherwise. In this alternate policy, the vehicle's charge level when departing from node  $i$  is  $\sum_{\ell=i}^{k-1} h_\ell$  instead of  $\sum_{\ell=i}^{k-1} h_\ell + \Delta$ . The next node where the vehicle stops to recharge is the same as in  $\pi_{\mathcal{N}}^R$ , although the vehicle recharges an extra amount  $\Delta$  so that the resulting charge level is the same as in the original policy. Beyond that node, both policies are identical.

Suppose that  $j$  is the next node after  $i$  at which the vehicle stops to recharge for a given sequence  $(a_{i+1}, \dots, a_j)$  of observed station availabilities (i.e.,  $A_\ell = a_\ell$  for all  $\ell \in (i+1, \dots, j)$ ). Then the expected cost of the policy  $\pi_{\mathcal{N}}^R$  for the state  $(i, q_i, a_i)$  is

$$C_{\pi_{\mathcal{N}}^R}(i, q_i, a_i) \mid (A_\ell = a_\ell \forall \ell \in (i+1, \dots, j)) = \sum_{\ell=i}^{j-1} t_\ell + s + (1 - a_i)W_i + c \left( \sum_{\ell=i}^{k-1} h_\ell - q_i + \Delta, q_i \right) + C_{\pi_{\mathcal{N}}^R} \left( j, \sum_{\ell=j}^{k-1} h_\ell + \Delta, a_j \right). \quad (1)$$

Now suppose that the same sequence of station availabilities is observed under policy  $\pi_{\mathcal{N}}^{R'}$ . Then the expected cost of the policy under such a scenario is

$$C_{\pi_{\mathcal{N}}^{R'}}(i, q_i, a_i) \mid (A_\ell = a_\ell \forall \ell \in (i+1, \dots, j)) = \sum_{\ell=i}^{j-1} t_\ell + s + (1 - a_i)W_i + c \left( \sum_{\ell=i}^{k-1} h_\ell - q_i, q_i \right) + C_{\pi_{\mathcal{N}}^{R'}} \left( j, \sum_{\ell=j}^{k-1} h_\ell, a_j \right). \quad (2)$$

When we compare the costs of the two policies for the given realization of observed station availabilities, we

find that

$$\begin{aligned}
(1) - (2) &= c\left(\sum_{\ell=i}^{k-1} h_\ell - q_i + \Delta, q_i\right) + C_{\pi_{\mathcal{N}}^R}\left(j, \sum_{\ell=j}^{k-1} h_\ell + \Delta, a_j\right) - c\left(\sum_{\ell=i}^{k-1} h_\ell - q_i, q_i\right) - C_{\pi_{\mathcal{N}}^{R'}}\left(j, \sum_{\ell=j}^{k-1} h_\ell, a_j\right) \\
&= c\left(\Delta, \sum_{\ell=i}^{k-1} h_\ell\right) + C_{\pi_{\mathcal{N}}^R}\left(j, \sum_{\ell=j}^{k-1} h_\ell + \Delta, a_j\right) - C_{\pi_{\mathcal{N}}^{R'}}\left(j, \sum_{\ell=j}^{k-1} h_\ell, a_j\right) \\
&= c\left(\Delta, \sum_{\ell=i}^{k-1} h_\ell\right) + c\left(\pi_{\mathcal{N}}^R\left(j, \sum_{\ell=j}^{k-1} h_\ell + \Delta, a_j\right), \sum_{\ell=j}^{k-1} h_\ell + \Delta\right) - c\left(\pi_{\mathcal{N}}^{R'}\left(j, \sum_{\ell=j}^{k-1} h_\ell, a_j\right), \sum_{\ell=j}^{k-1} h_\ell\right) \\
&= c\left(\Delta, \sum_{\ell=i}^{k-1} h_\ell\right) + c\left(\pi_{\mathcal{N}}^R\left(j, \sum_{\ell=j}^{k-1} h_\ell + \Delta, a_j\right), \sum_{\ell=j}^{k-1} h_\ell + \Delta\right) - c\left(\pi_{\mathcal{N}}^R\left(j, \sum_{\ell=j}^{k-1} h_\ell + \Delta, a_j\right) + \Delta, \sum_{\ell=j}^{k-1} h_\ell\right) \\
&= c\left(\Delta, \sum_{\ell=i}^{k-1} h_\ell\right) - c\left(\Delta, \sum_{\ell=j}^{k-1} h_\ell\right) \\
&\geq 0 \quad (\text{by convexity and monotone increasing property of } c(\cdot)) \tag{3}
\end{aligned}$$

since  $\sum_{\ell=i}^{k-1} h_\ell > \sum_{\ell=j}^{k-1} h_\ell + \Delta$ . The expression in (3) holds for any given sequence  $(a_{i+1}, \dots, a_j)$  of observed station availabilities such that  $j$  is the next node after  $i$  where the vehicle recharges, and because the probability of the sequence occurring is the same under both policies, the (unconditional) expected cost of the policy  $\pi_{\mathcal{N}}^{R'}$  is no greater than that of  $\pi_{\mathcal{N}}^R$  for the state  $(i, q_i, a_i)$ . It follows that there exists an optimal recharging policy  $\pi_{\mathcal{N}}^{R*} : \mathcal{S} \rightarrow \mathcal{A}^R$  such that

$$\pi_{\mathcal{N}}^{R*}(i, q_i, a_i) \in \left\{ \left( \sum_{\ell=i}^{k-1} h_\ell - q_i \right)^+ : k \in (i+1, \dots, n-1), \sum_{\ell=i}^{k-1} h_\ell \leq q_{max} \right\}$$

for all  $(i, q_i, a_i) \in \mathcal{S}$ . ■

## A.2.2 Proof of Lemma 2

**Proof.** We prove the claim by induction. At node 0, we have  $q_0 = 0 \in \mathcal{H}(1)$ , and by Lemma 1, there exists an optimal recharging policy  $\pi_{\mathcal{N}}^{R*}$  such that  $\pi_{\mathcal{N}}^{R*}(0, 0, \cdot) \in \mathcal{H}(1)$ .

Then assuming the claim holds for a node  $i \in (0, \dots, n-2)$ , suppose  $q_i = \sum_{\ell=i}^{j-1} h_\ell \in \mathcal{H}(i)$  for some  $j \in (i, \dots, n-1)$  and  $\pi_{\mathcal{N}}^{R*}(i, q_i, a_i) = \sum_{\ell=j}^{j'-1} h_\ell \in \mathcal{H}(j)$  for some  $j' \in (j, \dots, n-1)$ . At node  $i+1$ , the vehicle's charge level is

$$q_{i+1} = \sum_{\ell=i}^{j-1} h_\ell + \sum_{\ell=j}^{j'-1} h_\ell - h_i = \sum_{\ell=i+1}^{j'-1} h_\ell \in \mathcal{H}(i+1),$$

and by Lemma 1, we have

$$\begin{aligned}
\pi_{\mathcal{N}}^{R^*}(i+1, q_{i+1}, \cdot) &\in \left\{ \left( \sum_{\ell=i+1}^{k-1} h_{\ell} - q_{i+1} \right)^+ : k \in (i+2, \dots, n-1), \sum_{\ell=i}^{k-1} h_{\ell} \leq q_{max} \right\} \\
&\subseteq \left\{ \sum_{\ell=j'}^{k-1} h_{\ell} : k \in (j', \dots, n-1), \sum_{\ell=i}^{k-1} h_{\ell} \leq q_{max} \right\} \\
&\subseteq H(j').
\end{aligned}$$

Thus, the claim holds for node  $i+1$  as well, and it follows that  $q_i \in \mathcal{H}(i)$  and  $\pi_{\mathcal{N}}^{R^*}(i, q_i, a_i) \in \mathcal{H}(k)$  for any realized state  $(i, q_i, a_i) \in \mathcal{S}$  given that the initial state is  $(0, 0, \cdot)$ . ■
